# Supplementary material for: Assessing the importance of nitric acid and ammonia for particle growth in the polluted boundary layer
Source: Royal Society of Chemistry journal article supplement (doi:10.1039/d3ea00001j), 2024-01-01
Supplement: d3ea00001j1.pdf [file d3ea00001j1.pdf]

## Supplement of Assessing the importance of nitric acid and ammonia for particle growth in the polluted boundary layer

Ruby Marten<sup>1</sup>, Mao Xiao<sup>1</sup>, Mingyi Wang<sup>2</sup>, Weimeng Kong<sup>2</sup>, Xu-Cheng He<sup>3,4</sup>, Dominik Stolzenburg<sup>3,5</sup>, Joschka Pfeifer<sup>6,7</sup>, Guillaume Marie<sup>7</sup>, Dongyu S. Wang<sup>1</sup>, Andrea Baccharini<sup>1,8</sup>, Chuan Ping Lee<sup>1</sup>, Antonio Amorim<sup>9</sup>, Rima Baalbaki<sup>3</sup>, David M. Bell<sup>1</sup>, Barbara Bertozzi<sup>10</sup>, Lucía Caudillo<sup>7</sup>, Lubna Dada<sup>1</sup>, Jonathan Duplissy<sup>3,11</sup>, Henning Finkenzeller<sup>12</sup>, Martin Heinritzi<sup>7</sup>, Markus Lampimäki<sup>3</sup>, Katrianne Lehtipalo<sup>3,4</sup>, Hanna E. Manninen<sup>6</sup>, Bernhard Mentler<sup>13</sup>, Antti Onnela<sup>6</sup>, Tuukka Petäjä<sup>3</sup>, Maxim Philippov<sup>14</sup>, Birte Rörup<sup>3</sup>, Wiebke Scholz<sup>13</sup>, Jiali Shen<sup>3</sup>, Yee Jun Tham<sup>3</sup>, António Tomé<sup>15</sup>, Andrea C. Wagner<sup>7,12,16</sup>, Stefan K. Weber<sup>6,7</sup>, Marcel Zauner-Wieczorek<sup>7</sup>, Joachim Curtius<sup>7</sup>, Markku Kulmala<sup>3</sup>, Rainer Volkamer<sup>12</sup>, Douglas R. Worsnop<sup>3,17</sup>, Josef Dommen<sup>1</sup>, Richard C. Flagan<sup>2</sup>, Jasper Kirkby<sup>6,7</sup>, Neil McPherson Donahue<sup>18</sup>, Houssni Lamkaddam<sup>1,@</sup>, Urs Baltensperger<sup>1</sup>, Imad El Haddad<sup>1,@</sup>

<sup>1</sup>Laboratory of Atmospheric Chemistry, Paul Scherrer Institute, 5232 Villigen, Switzerland.

<sup>2</sup>California Institute of Technology, Division of Chemistry and Chemical Engineering 210-41, Pasadena, CA 91125, USA.

<sup>3</sup>Institute for Atmospheric and Earth System Research (INAR)/ Helsinki Institute of Physics, Faculty of Science, University of Helsinki, 00014 Helsinki, Finland.

<sup>4</sup>Finnish Meteorological Institute, FI-00560 Helsinki, Finland

<sup>5</sup>Institute for Materials Chemistry, TU Wien, 1060 Vienna, Austria

<sup>6</sup>CERN, CH-1211 Geneva, Switzerland.

<sup>7</sup>Institute for Atmospheric and Environmental Sciences, Goethe University Frankfurt, 60438 Frankfurt am Main, Germany.

<sup>8</sup>Atmospheric Processes and their Impact, École Polytechnique Fédérale de Lausanne, 1015 Lausanne, CH.

<sup>9</sup>CENTRA and FCUL, University of Lisbon, 1749-016 Lisbon, Portugal.

<sup>10</sup>Institute of Meteorology and Climate Research, Karlsruhe Institute of Technology, 76021 Karlsruhe, Germany.

<sup>11</sup>Helsinki Institute of Physics (HIP)/Physics, Faculty of Science, University of Helsinki, 00014 Helsinki, Finland

<sup>12</sup>Department of Chemistry & CIRES, University of Colorado Boulder, 215 UCB, Boulder, 80309, CO, USA.

<sup>13</sup>Institute of Ion Physics and Applied Physics, University of Innsbruck, 6020 Innsbruck, Austria

<sup>14</sup>Lebedev Physical Institute of the Russian Academy of Sciences, 119991, Moscow, Leninsky prospekt, 53, Russian Federation.

<sup>15</sup>DL-Universidade da Beira Interior, 6201-001 Covilhã, Portugal.

<sup>16</sup>Aerosol Physics Laboratory, Physics Unit, Tampere University, FI-33014 Tampere, Finland

<sup>17</sup>Aerodyne Research, 01821 Billerica, MA, USA

<sup>18</sup>Center for Atmospheric Particle Studies, Carnegie Mellon University, 1521 Pittsburgh, PA, USA.

@Corresponding authors e-mails: [houssni.lamkaddam@psi.ch](mailto:houssni.lamkaddam@psi.ch), [imad.el-haddad@psi.ch](mailto:imad.el-haddad@psi.ch)

## Summary

This supplementary information (SI) section presents supplementary figures exploring growth by  $\text{N}_2\text{O}_5$ , sensitivity tests of the kinetic model, particle composition outputs from the model, and model results with the resolution of a long scanning mobility particle sizer (LSMPS).

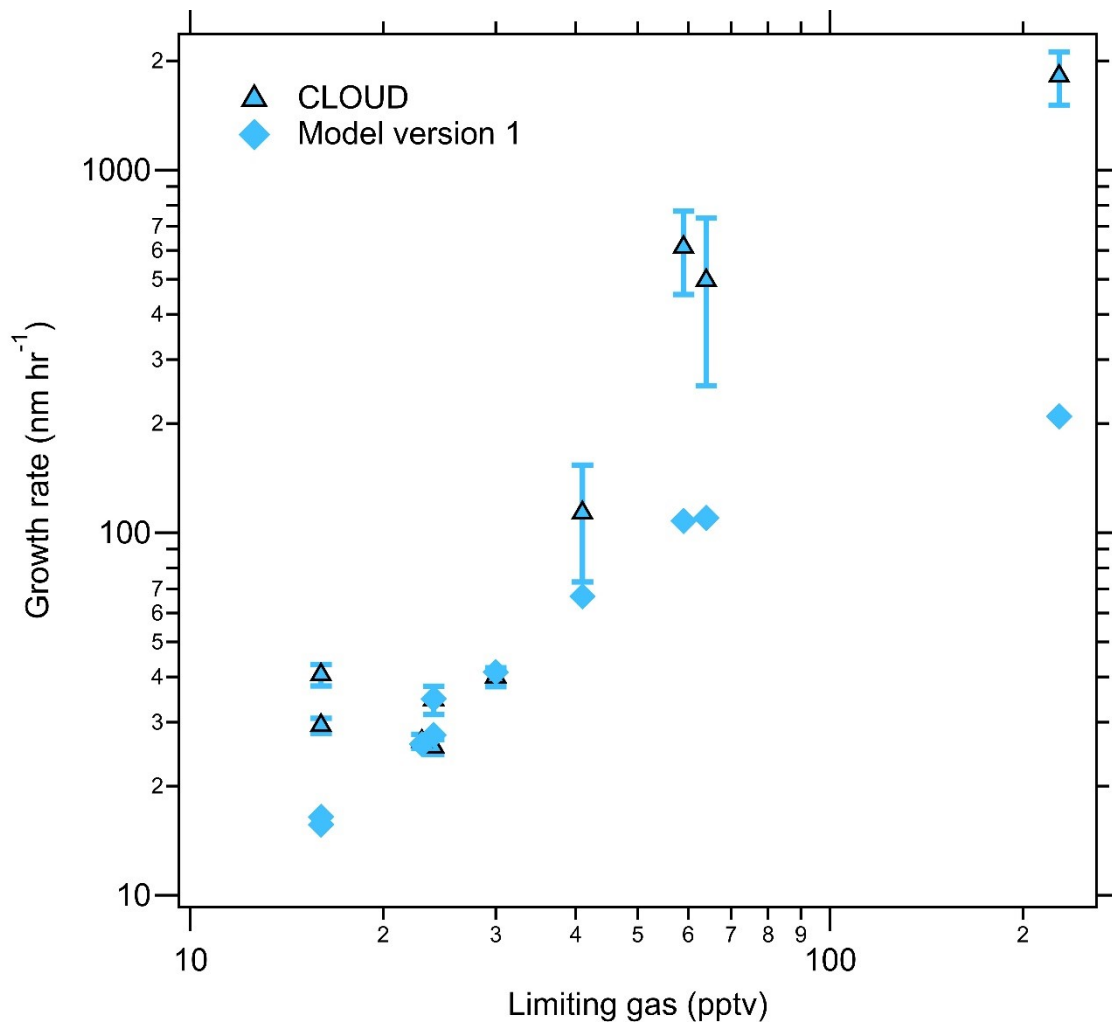

**Figure S1 : Growth rates using input of  $\text{HNO}_3$  as the limiting gas.** All of the  $-10^\circ\text{C}$  runs were limited by  $\text{HNO}_3$ , these modelled growth rates are calculated using only the measured  $\text{HNO}_3$  concentration, whereas for the model results presented in Fig. 1 the concentration of  $\text{N}_2\text{O}_5$  was added to the  $\text{HNO}_3$  concentration for the model constraints. Including the  $\text{N}_2\text{O}_5$  concentrations in the model brought the model and measured growth rates closer together, and also shifted the points right on the x-axis since the gas concentration was increased.

**Table S1: Data from figure S1.**  $\text{N}_2\text{O}_5$  was modelled assuming that it has the same wall and condensation sink losses as  $\text{HNO}_3$  and  $\text{H}_2\text{SO}_4$ .

| Run | Limiting gas / pptv | GR / nm hr <sup>-1</sup> | $\text{N}_2\text{O}_5$ / pptv | $\text{N}_2\text{O}_5$ / pptv assuming no wall loss |
|-----|---------------------|--------------------------|-------------------------------|-----------------------------------------------------|
| 1   | 228                 | 1814.3                   | 150                           | 1300                                                |
| 2   | 64                  | 495.6                    | 24                            | 196                                                 |
| 3   | 41                  | 113.41                   | 17                            | 150                                                 |
| 4   | 59                  | 611.97                   | 9                             | 370                                                 |
| 5   | 24                  | 25.65                    | 2e-2                          | 0.1                                                 |
| 6   | 24                  | 34.6                     | 2e-2                          | 0.1                                                 |

|    |    |       |      |      |
|----|----|-------|------|------|
| 7  | 23 | 26.6  | 1e-2 | 2e-2 |
| 8  | 30 | 40.01 | 2e-2 | 6e-2 |
| 9  | 16 | 29.39 | 3e-3 | 2e-2 |
| 10 | 16 | 40.54 | 1e-2 | 0.1  |

$$Flux_A = v_{dep} \div h_{BL} \quad (S1)$$

$$p_A = [A_i] \times Flux_A \quad (S2)$$

We calculated suitable production values of HNO<sub>3</sub>, NH<sub>3</sub>, and H<sub>2</sub>SO<sub>4</sub> based on the required steady-state concentration in the absence of condensation. The vertical dry deposition fluxes of gas A,  $Flux_A$ , were calculated using equation S1 with literature deposition velocities,  $v_{dep}$ , for HNO<sub>3</sub>, NH<sub>3</sub>, and H<sub>2</sub>SO<sub>4</sub>, shown in Table S2. The height of the boundary layer,  $h_{BL}$ , used was 1km. The production values of HNO<sub>3</sub> and NH<sub>3</sub> were calculated using equation S2 from the deposition flux, and initial concentration of A,  $[A_i]$ , considering the deposition flux as the highest loss rate for both gases. The production rate of H<sub>2</sub>SO<sub>4</sub> was calculated considering new particle formation as the highest loss rate of gaseous H<sub>2</sub>SO<sub>4</sub>. The initial concentrations and production rates for the experiments in sections “Effect of inhomogeneity of NH<sub>3</sub> concentrations in cities” and “Effect of temperature change during vertical transport” are shown in Table S2.

**Table S2: Calculation of diffusion losses**

| Gas                            | Simulation                      | T/°C | Deposition Velocity $v_{dep}$ / cm s <sup>-1</sup> | Boundary layer height / cm | Initial concentration                        | Production rate / molecules cm <sup>-3</sup> s <sup>-1</sup> |
|--------------------------------|---------------------------------|------|----------------------------------------------------|----------------------------|----------------------------------------------|--------------------------------------------------------------|
| HNO <sub>3</sub>               | Temperature change              | 15   | 4 <sup>1</sup>                                     | 100,000                    | 1 ppbv                                       | 1.1×10 <sup>6</sup>                                          |
| NH <sub>3</sub>                | Temperature change              | 15   | 2 <sup>2</sup>                                     | 100,000                    | 3 ppbv                                       | 1.6×10 <sup>6</sup>                                          |
| H <sub>2</sub> SO <sub>4</sub> | Temperature change              | 15   | 1.5 <sup>1</sup>                                   | 100,000                    | 1×10 <sup>7</sup> molecules cm <sup>-3</sup> | 1.6×10 <sup>5</sup>                                          |
| HNO <sub>3</sub>               | NH <sub>3</sub> inhomogeneities | 5    | 4 <sup>1</sup>                                     | 100,000                    | 0.2 ppbv                                     | 3.3×10 <sup>5</sup>                                          |
| NH <sub>3</sub>                | NH <sub>3</sub> inhomogeneities | 5    | 2 <sup>2</sup>                                     | 100,000                    | 1 ppbv                                       | 6.5×10 <sup>5</sup>                                          |
| H <sub>2</sub> SO <sub>4</sub> | NH <sub>3</sub> inhomogeneities | 5    | 1.5 <sup>1</sup>                                   | 100,000                    | 1×10 <sup>7</sup> molecules cm <sup>-3</sup> | 2.2×10 <sup>5</sup>                                          |

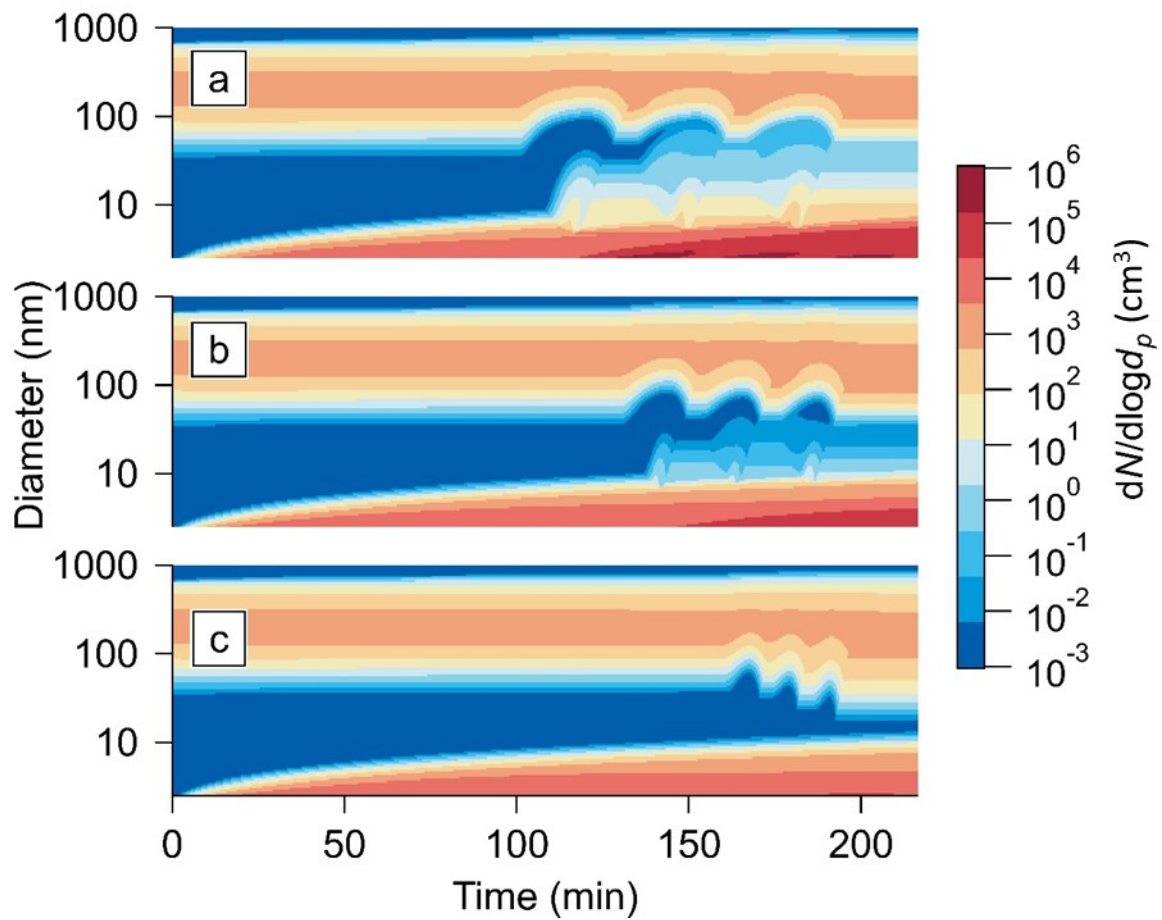

**Figure S2: Temperature change sensitivity tests.** All model Initial conditions are 3 ppbv  $\text{NH}_3$ , 1 ppbv  $\text{HNO}_3$  and  $1 \times 10^7$  molecules  $\text{cm}^{-3}$   $\text{H}_2\text{SO}_4$ . **a)** Repeat of model presented in Fig. 2c) with a change in temperature of 15°C from 15°C to 0°C. Displayed here for comparison. **b)** Repeat of a) but with a temperature change of 10°C from 15°C to 5°C. **c)** Repeat of a) with a temperature change of 5°C from 15°C to 10°C. It is clear that a larger temperature change results in a bigger change to the nucleation mode.

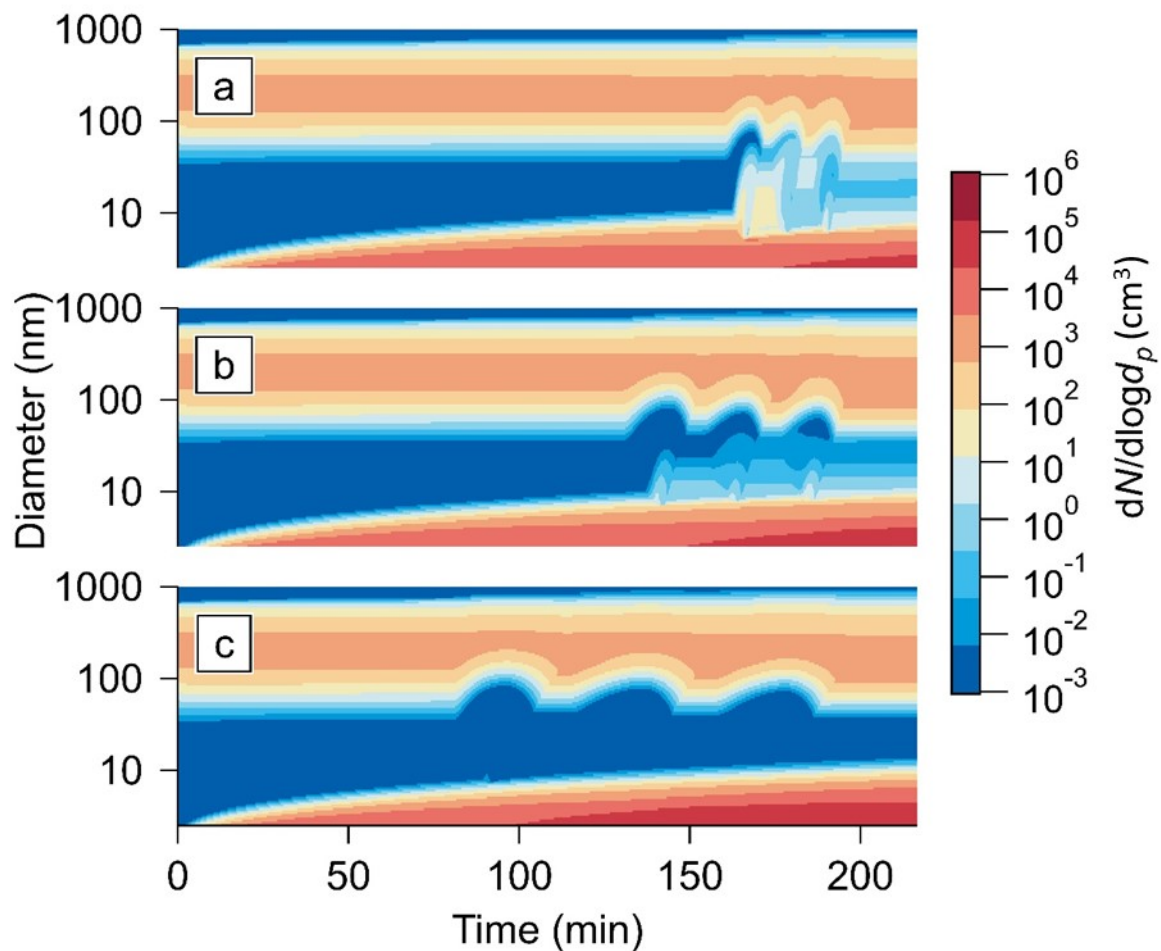

**Figure S3: Rate of temperature change sensitivity tests.** All model initial conditions are 3 ppbv  $\text{NH}_3$ , 1 ppbv  $\text{HNO}_3$  and  $1 \times 10^7$  molecules  $\text{cm}^{-3}$   $\text{H}_2\text{SO}_4$ . **a)** Model results with a temperature change of  $10^\circ\text{C}$  from  $15^\circ\text{C}$  to  $5^\circ\text{C}$  over 5 minutes. **b)** Repeat of Figure S2b) Model results with a temperature change of  $10^\circ\text{C}$  from  $15^\circ\text{C}$  to  $5^\circ\text{C}$  over 10 minutes. Displayed here for comparison. **c)** Model results with a temperature change of  $10^\circ\text{C}$  from  $15^\circ\text{C}$  to  $5^\circ\text{C}$  over 20 minutes. This shows that the temperature change must be fast to affect the growing particles.

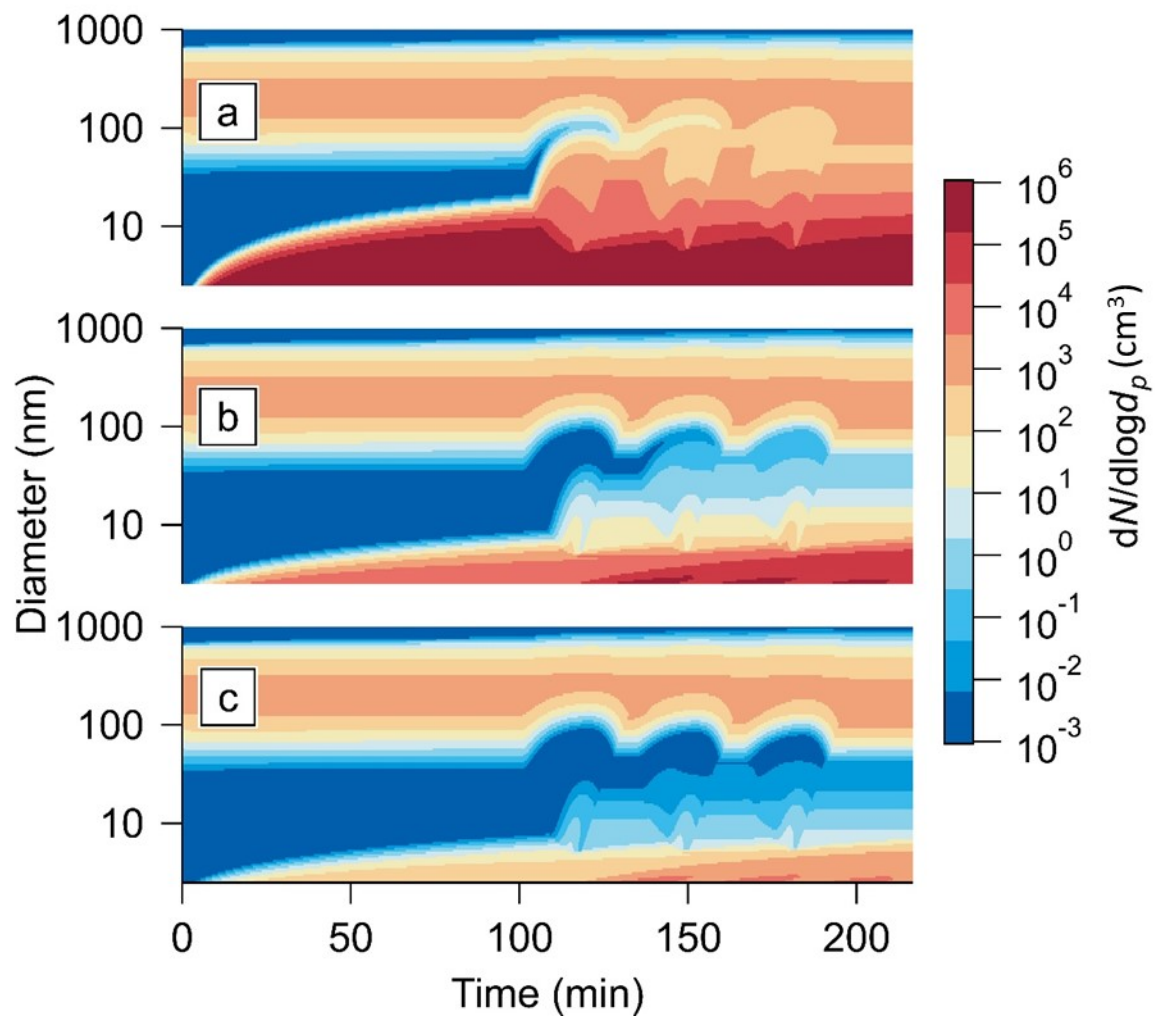

**Figure S4: Nucleation rate sensitivity tests.** **a)** Model results with a temperature change of 15°C from 15°C to 0°C with kinetic nucleation rates. **b)** Repeat of model presented in Fig. 2c) with a change in temperature of 15°C from 15°C to 0°C. Displayed here for comparison. **c)** Repeat of b) but with fifty times lower nucleation rates. Since the nucleation rate affects the pre-existing particle distribution at the time of activation, a lower nucleation rate can result in activation of fewer particles.

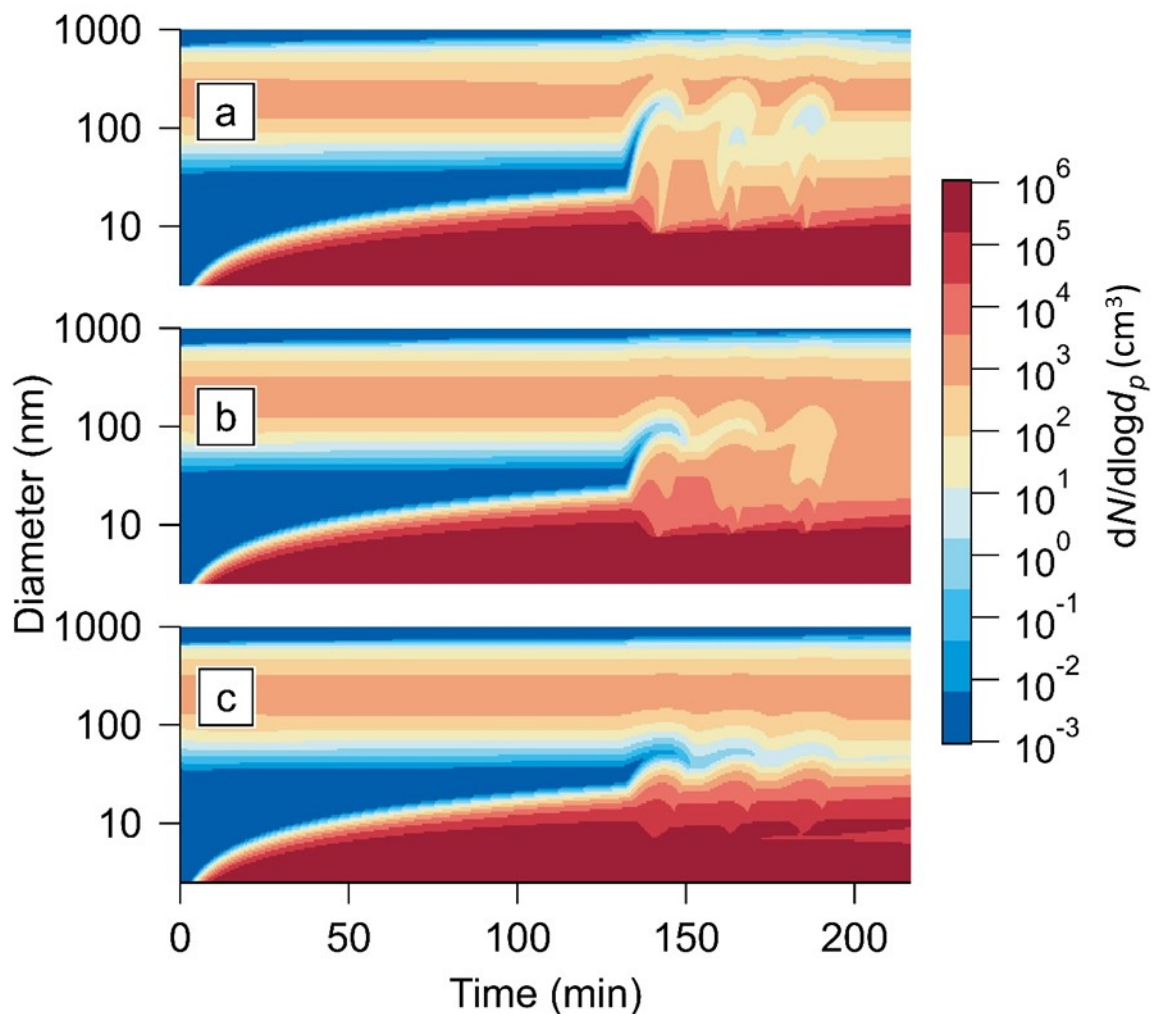

**Figure S5: Initial temperature sensitivity tests. a)** Model results with a temperature change of 10°C from 20°C to 10°C with kinetic nucleation rates. **b)** Model results with a temperature change of 10°C from 15°C to 5°C with kinetic nucleation rates. **c)** Model results with a temperature change of 10°C from 10°C to 0°C with kinetic nucleation rates.

Figure S6 shows the relationship of the dissociation constant,  $K_p$ , with temperature. It can be seen that in steady-state conditions, where the product of concentrations of gas phase  $\text{NH}_3$  and  $\text{HNO}_3$  are equal to the saturation temperature, a change in 10°C from 20°C to 10°C results in more available gas to condense than for 10°C to 0°C.  $K_p$  can be calculated by integrating the van't Hoff equation<sup>3</sup>. Equation S.1 shows the equation for  $K_p$  in units of  $\text{ppb}^2$  (assuming 1 atm of total pressure)<sup>4</sup>.

$$\ln K_p = 118.87 - \frac{24,084}{T} - 6.025 \ln T \quad (\text{S.1})$$



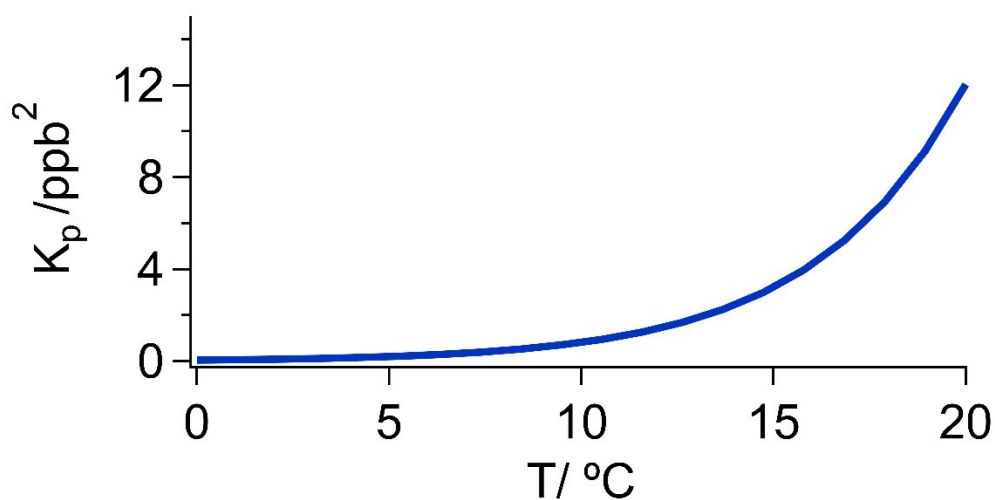

Figure S6: Dissociation constant of  $\text{NH}_4\text{NO}_3$  ( $K_p/\text{ppb}^2$ ) vs temperature ( $T/^\circ\text{C}$ ).

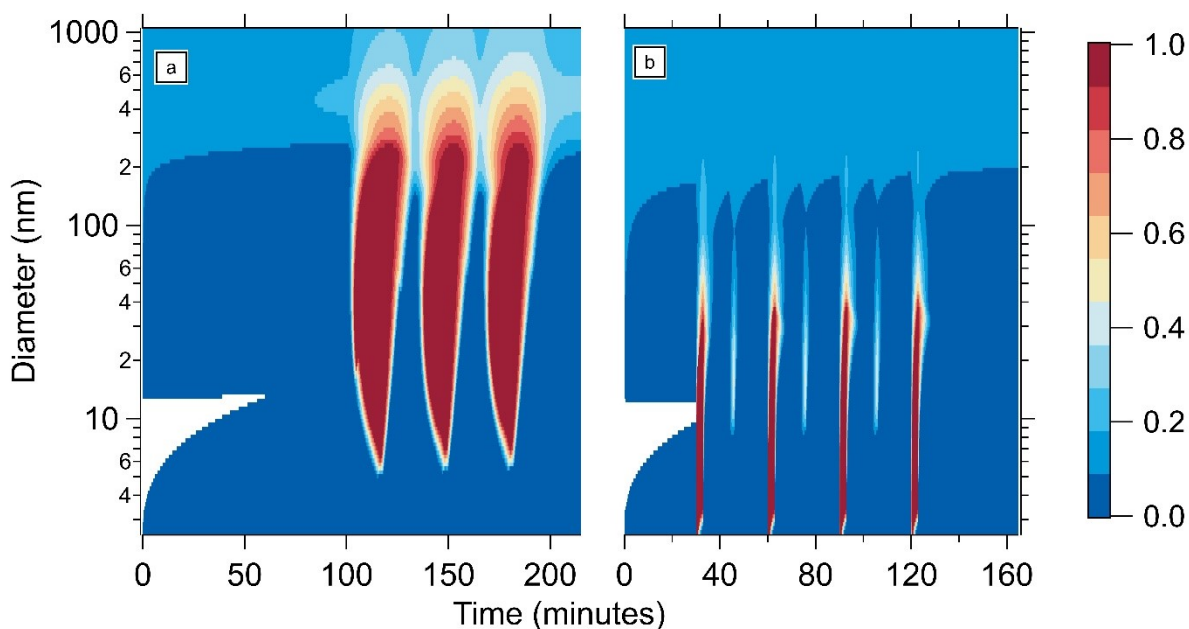

Figure S7: Number fraction of  $\text{NH}_4\text{NO}_3$  from Fig. 2 and Fig. 3 as a function of time. Number fraction is defined as the number concentration ratio ( $\text{molecules cm}^{-3} / \text{total molecules cm}^{-3}$ ). The simulated condensation sink starts with 10%  $\text{NH}_4\text{NO}_3$  and the inputs of  $\text{NH}_3$  and  $\text{HNO}_3$  are saturated at 200 nm (i.e. 200 nm is the activation diameter). **a)** Model results from Fig. 2c) (temperature change due to vertical transport). **b)** Model results from Fig. 3c) (inhomogeneities due to spikes of  $\text{NH}_3$ ). The white colour represents absence of particles.

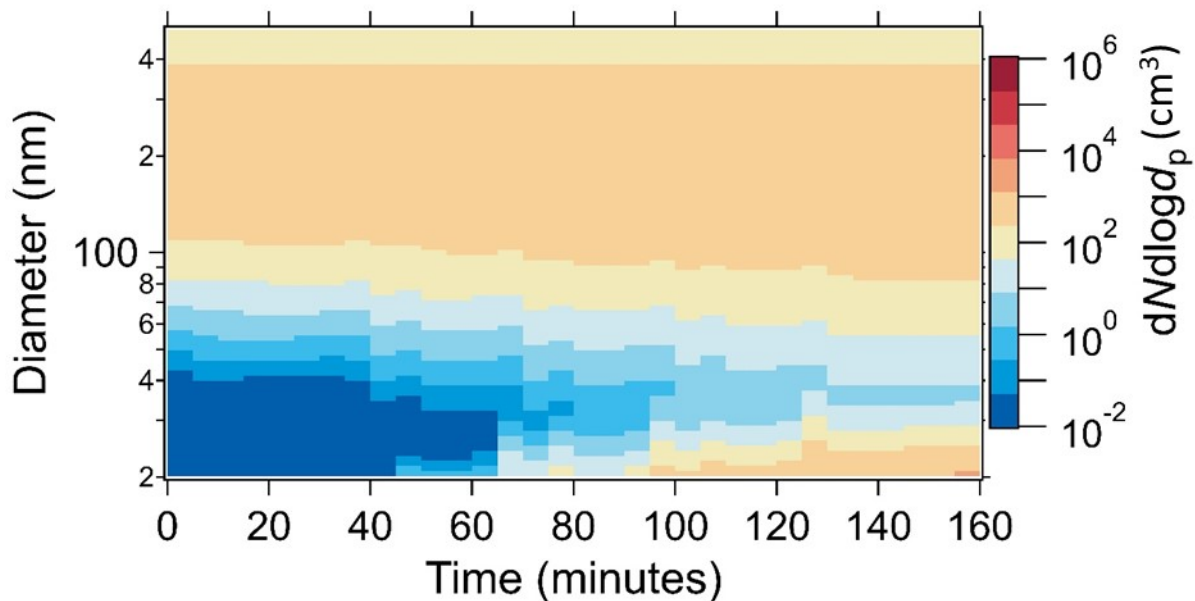

**Figure S8: Low-resolution replication of Fig. 3b).** The size distribution from the model output presented in Fig. 3b) was interpolated to the size bins of the long SMPS (89 logarithmically spaced size bins 20-480 nm) and 5-minute time resolution. This illustrates that inhomogeneities may not be as noticeable in ambient measurements.

## References

- 1 J. Seinfeld H. and S. Pandis N., *Atmospheric Chemistry and Physics*, John Wiley & Sons, 2006, vol. 2nd edn.
- 2 R. San Jose, F. J. Moreno and M. A. San Feliu, eds. P. Fabian, V. Klein, M. Tacke, K. Weber and C. Werner, Munich, Germany, 1995, pp. 274–285.
- 3 K. G. Denbigh, *The Principles of Chemical Equilibrium: With Applications in Chemistry and Chemical Engineering*, Cambridge University Press, 1981.
- 4 M. Mozurkewich, *Atmospheric Environment. Part A. General Topics*, 1993, **27**, 261–270.
